# Supplementary material for: Removal of Cr(VI) from Wastewater Using Acrylonitrile Grafted Cellulose Extracted from Sugarcane Bagasse
Source: MDPI journal article supplement (doi:10.3390/molecules29102207), 2024-05-08
Supplement: s1 [file s1]

<Supplementary material>

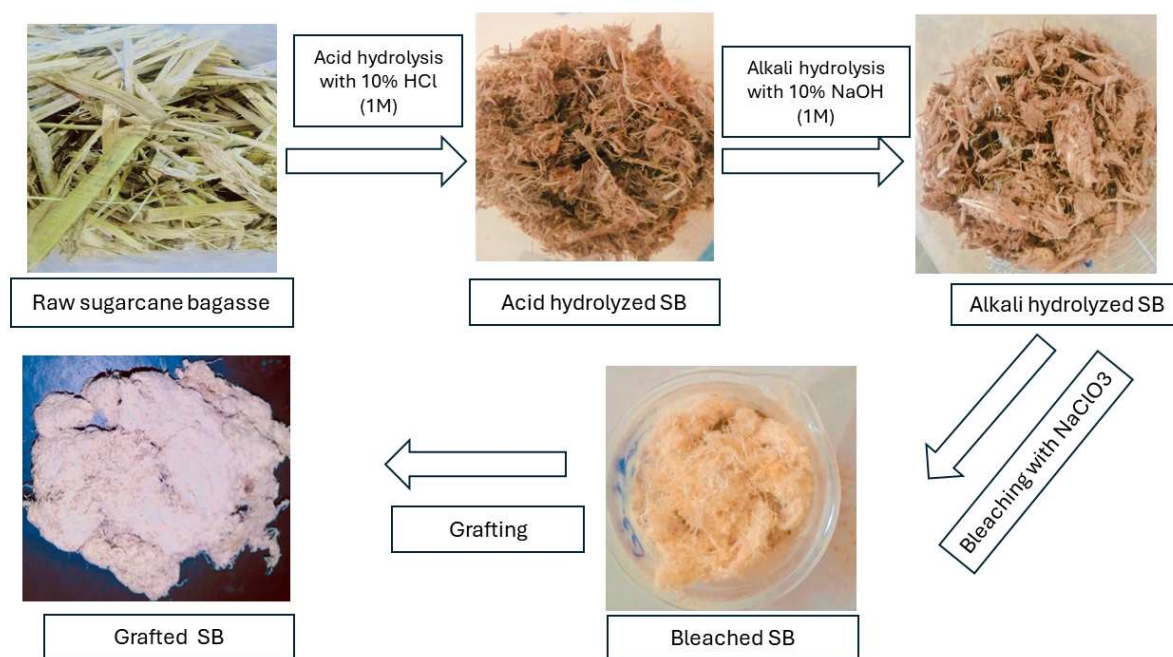

Figure S1. Isolation of cellulose from sugarcane bagasse by acid hydrolysis, alkaline hydrolysis, bleaching and its grafting.
